# Supplementary material for: Fasting Induces Hepatocellular Carcinoma Cell Apoptosis by Inhibiting SET8 Expression
Source: Hindawi journal article supplement (doi:10.1155/2020/3985089), 2020-03-21
Supplement: f1 [file 3985089.f1.pdf]

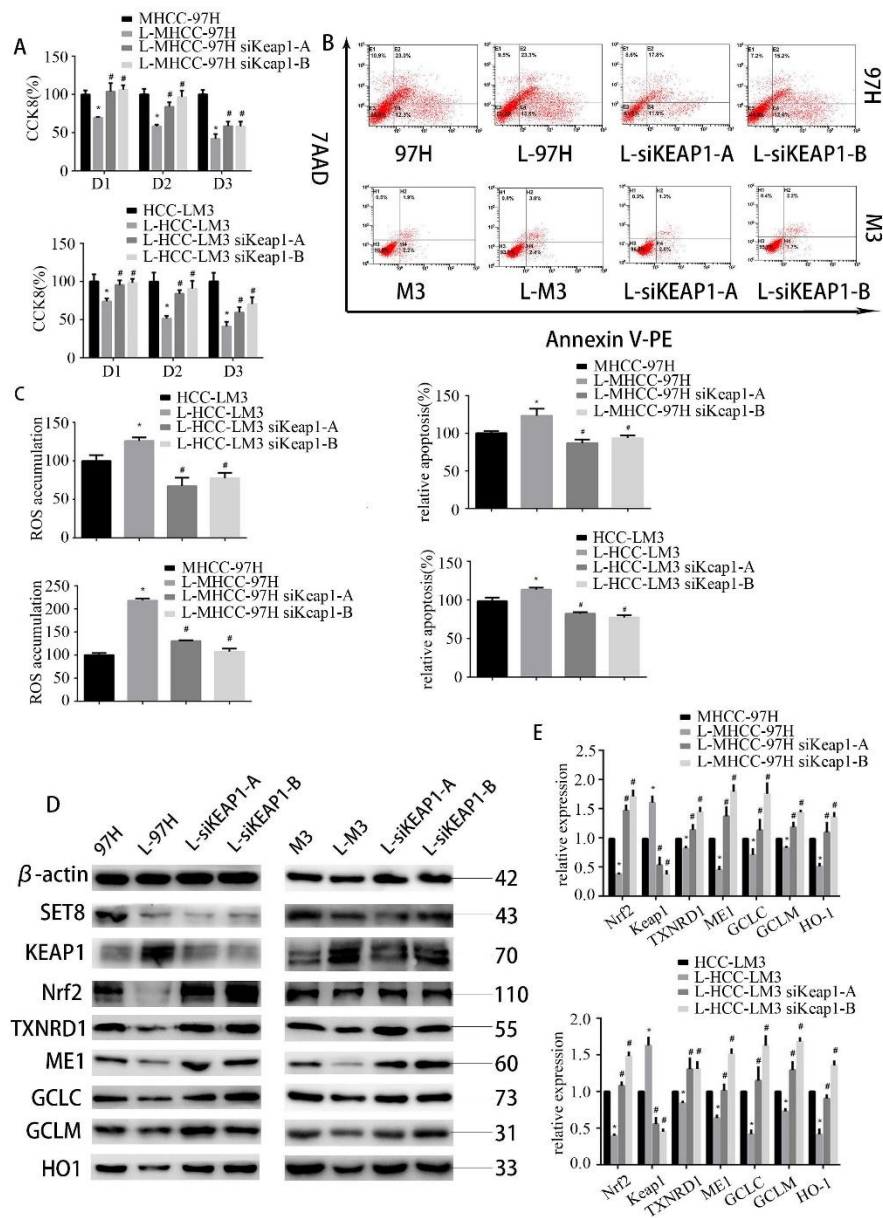

**Supplementary Figure S1**

(A) Proliferation of MHCC-97H and HCC-LM3 cells under fasting conditions for 24 h or fasting in combination with Keap1 knockdown. (B) Flow cytometry was used to detect the number of apoptotic MHCC-97H and HCC-LM3 cells under fasting conditions for 24 h or fasting in combination with Keap1 knockdown. (C) The level of reactive oxygen species in MHCC-97H and HCC-LM3 cells under fasting conditions for

24 h or fasting in combination with Keap1 knockdown. (D) Western blot analysis of SET8 and Keap1/Nrf2/ARE signalling pathway components in MHCC-97H and HCC-LM3 cells under fasting conditions for 24 h or fasting in combination with Keap1 knockdown. (E) qPCR analysis of SET8 and Keap1/Nrf2/ARE signalling pathway components in MHCC-97H and HCC-LM3 cells under fasting conditions for 24 h or fasting in combination with Keap1 knockdown. Data are shown as the mean  $\pm$  SD of five independent experiments. \* $P < 0.05$  vs the control group. #  $P < 0.05$  vs the fasting group.

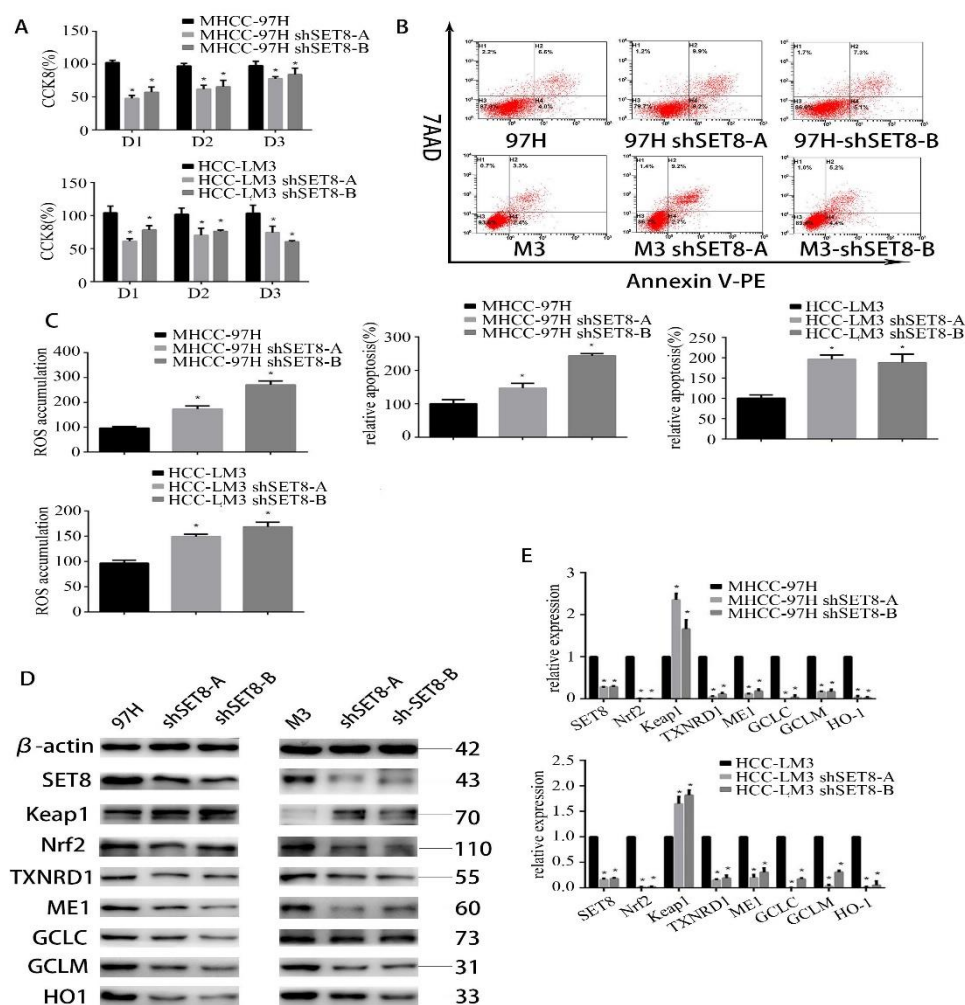

## Supplementary Figure S2

(A) Proliferation of MHCC-97H and HCC-LM3 cells following SET8 knockdown. (B) Flow cytometry was used to detect the number of apoptotic MHCC-97H and HCC-LM3 cells following SET8 knockdown. (C) The level of reactive oxygen species in MHCC-97H and HCC-LM3 cells following SET8 knockdown. (D) Western blot analysis of SET8 and Keap1/Nrf2/ARE signalling pathway components in MHCC-97H and HCC-LM3 cells following SET8 knockdown. (E) qPCR analysis of SET8 and Keap1/Nrf2/ARE signalling pathway components in MHCC-97H and

HCC-LM3 cells following SET8 knockdown. Data are shown as the mean  $\pm$  SD of five independent experiments. \* $P < 0.05$  vs the control group.

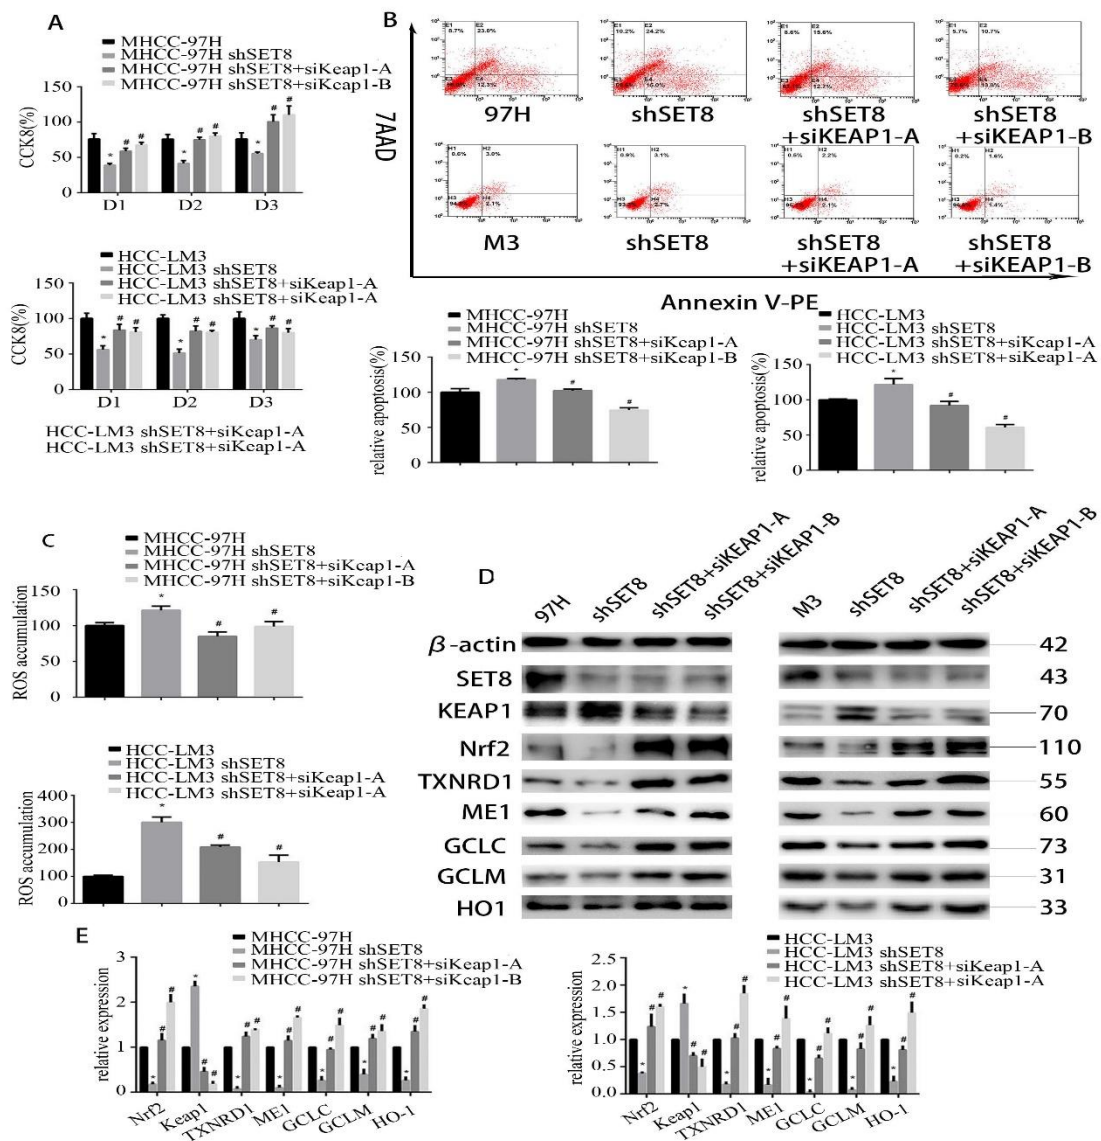

### Supplementary Figure S3

(A) Proliferation of MHCC-97H and HCC-LM3 cells following SET8 knockdown alone or in combination with Keap1 knockdown. (B) Flow cytometry was used to detect the number of apoptotic MHCC-97H and HCC-LM3 cells following SET8 knockdown alone or in combination with Keap1 knockdown. (C) The level of reactive oxygen species in MHCC-

97H and HCC-LM3 cells following SET8 knockdown alone or in combination with Keap1 knockdown. (D) Western blot analysis of SET8 and Keap1/Nrf2/ARE signalling pathway components in MHCC-97H and HCC-LM3 cells following SET8 knockdown alone or in combination with Keap1 knockdown. (E) qPCR analysis of SET8 and Keap1/Nrf2/ARE signalling pathway components in MHCC-97H and HCC-LM3 cells following SET8 knockdown alone or in combination with Keap1 knockdown. Data are shown as the mean  $\pm$  SD of five independent experiments. \* $P < 0.05$  vs the control group. #  $P < 0.05$  vs SET8 knockdown group.

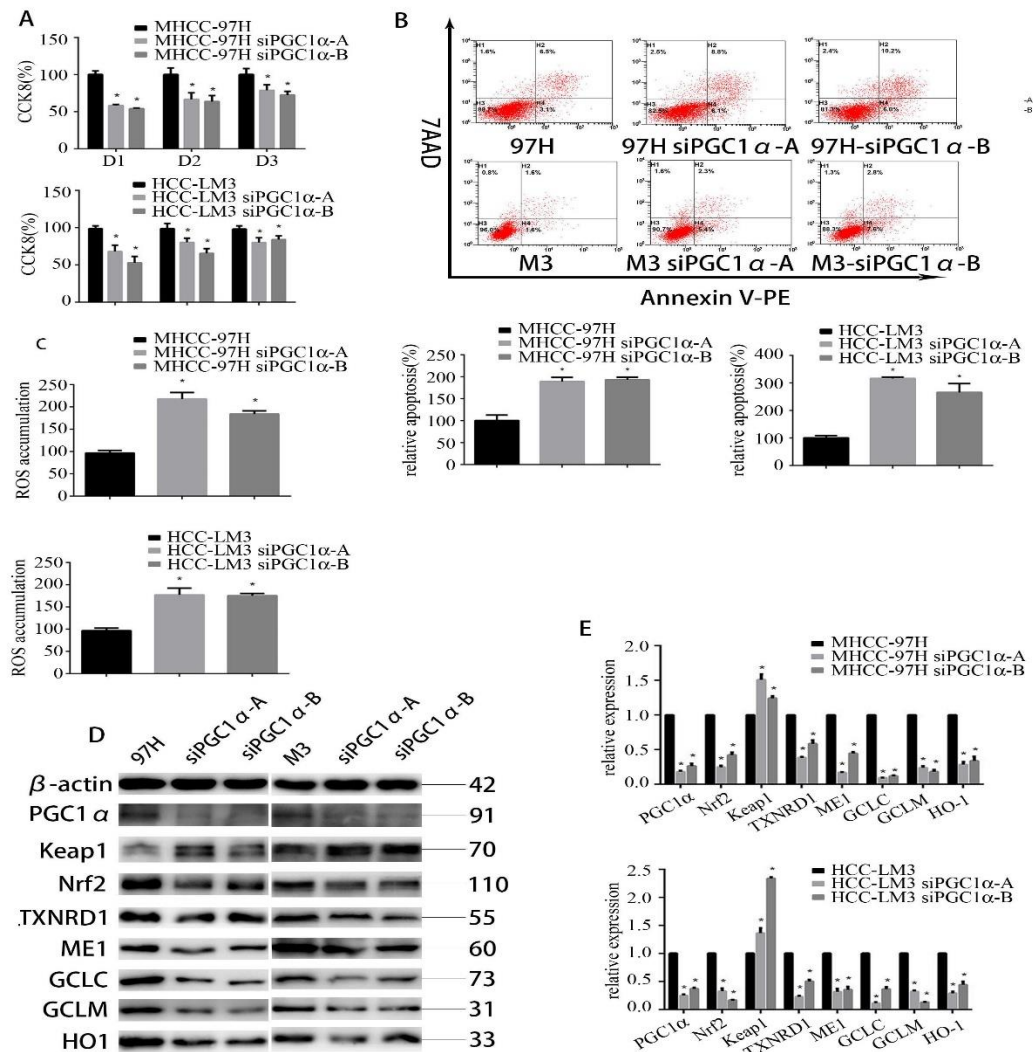

## Supplementary Figure S4

(A) Proliferation of MHCC-97H and HCC-LM3 cells following PGC1 $\alpha$  knockdown. (B) Flow cytometry was used to detect the number of apoptotic MHCC-97H and HCC-LM3 cells following PGC1 $\alpha$  knockdown. (C) The level of reactive oxygen species in MHCC-97H and HCC-LM3 cells following PGC1 $\alpha$  knockdown. (D) Western blot analysis of PGC1 $\alpha$  and Keap1/Nrf2/ARE signalling pathway components in MHCC-97H and HCC-LM3 cells following PGC1 $\alpha$  knockdown. (E) qPCR analysis of PGC1 $\alpha$  and Keap1/Nrf2/ARE signalling pathway components in MHCC-

97H and HCC-LM3 cells following PGC1 $\alpha$  knockdown. Data are shown as the mean  $\pm$  SD of three independent experiments. \* $P < 0.05$  vs the control group.
